# Supplementary material
Source: MDPI journal article supplement (https://www.mdpi.com/2076-3298/11/3/41)
Supplement: s1 [file s1]

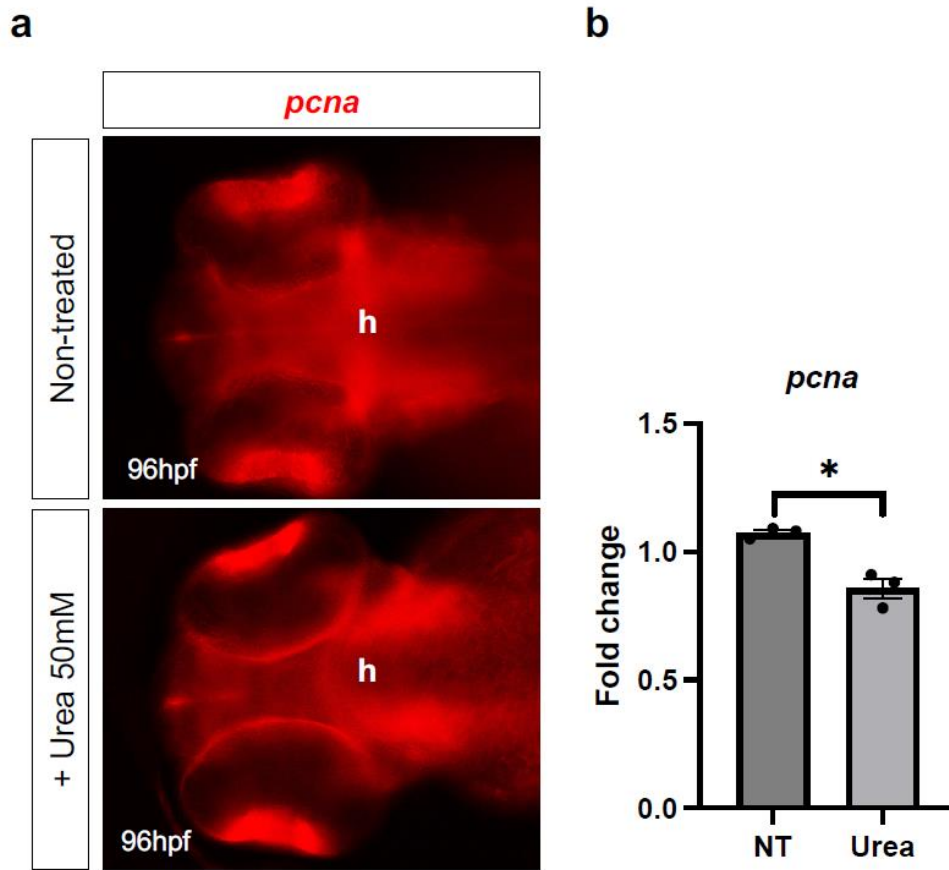

**Figure S1.** a) Dorsal view of heads, fluorescence WISH for *pcna* in embryos non-treated and treated with urea at 96hpf. b) qPCR for *pcna* in the heads of embryos non-treated and treated with urea.
